# Supplementary material for: GIANA allows computationally-efficient TCR clustering and multi-disease repertoire classification by isometric transformation
Source: PubMed Central journal article supplement (PMC8339063; doi:10.1038/s41467-021-25006-7), 2021-08-04
Supplement: 41467_2021_25006_MOESM1_ESM.pdf [file 41467_2021_25006_MOESM1_ESM.pdf]

1 **Supplementary Figures**

2

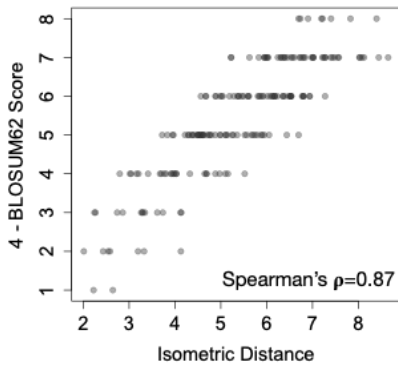

3

4 **Figure S1. Performance of MDS-based isometric embedding.** Euclidean distances (squared) between  
5 pairs of amino acids were calculated, and compared to the corresponding transformed BLOSUM62  
6 dissimilarity scores (4-BLOSUM62 scores, with diagonal set 0). Spearman's correlation was calculated to  
7 evaluate the similarity of the two measures.

8

9

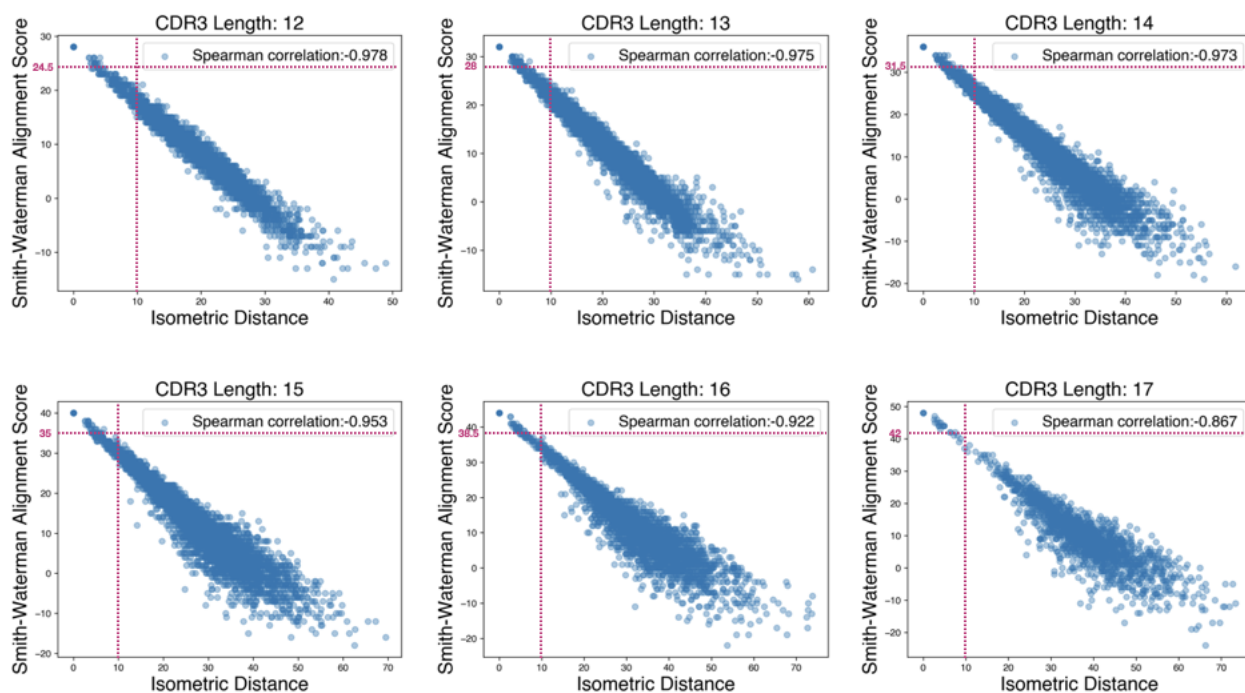

10  
 11 **Figure S2. Comparison of  $G_6$ -encoded isometric distances for CDR3 strings with Smith-Waterman**  
 12 **alignment scores.** Analysis was performed for CDR3s with lengths 12 to 17. Euclidean distances (squared)  
 13 between pairs of CDR3s were calculated, and compared to the corresponding Smith-Waterman alignment  
 14 scores using BLOSUM62 as substitution matrix. The Spearman's correlation values were negative because  
 15 higher alignment scores implicate higher similarity, which corresponded to smaller distances. This is  
 16 different from the dissimilarity scores used in Figure S1. With -S option 3.5 or above, a raw Smith  
 17 Waterman alignment score of  $3.5 \times (L - 5)$  is required to pass the clustering threshold, where L is  
 18 sequence length. In each panel, horizontal lines label the position of  $3.5 \times (L - 5)$ , where vertical lines  
 19 indicating an isometric distance of 10, which is the default cutoff in GIANA.

20  
 21

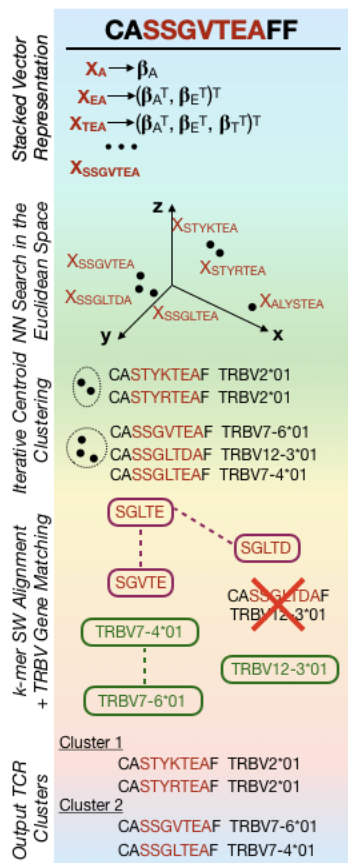

22  
 23  
 24  
 25  
 26  
 27  
 28  
 29  
 30  
 31

**Figure S3. Schematic illustration of stacked vector representation for GIANAsv.** For each input sequence, we concatenated the isometric vectors of each amino acid orderly to obtain a 16-by-L dimensional encoding vector, where L is the length of the CDR3 sequence. This encoding is the simplest way to preserve the isometric distance for BLOSUM62 substitution matrix. Similar to GIANA, After obtaining the encoding vectors for all the CDR3s of the same length, faiss nearest neighbor search was performed to divide the TCRs into preclusters, which were subsequently grouped into the final clusters with motif-guided SW alignment and variable gene matching.

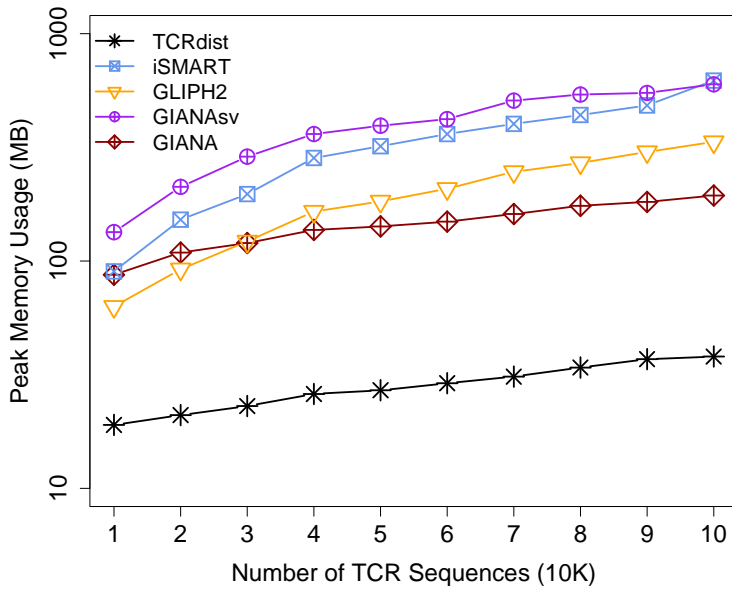

32  
33  
34  
35

**Figure S4. Memory usage of five competing methods.** Memory allocation was estimated when evaluating time complexity in Figure 2a.

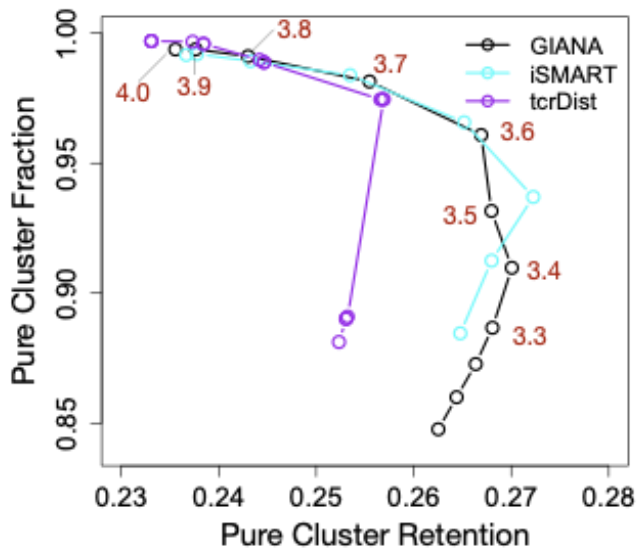

36  
37  
38  
39

**Figure S5. Parameter screening of methods using Smith-Waterman alignment in the TCR clustering.** By changing the cutoff of the alignment score, for each method, Pure Cluster Fraction and Retention were calculated as described in the main text. The values for GIANA (-S option) are labeled as text labels.

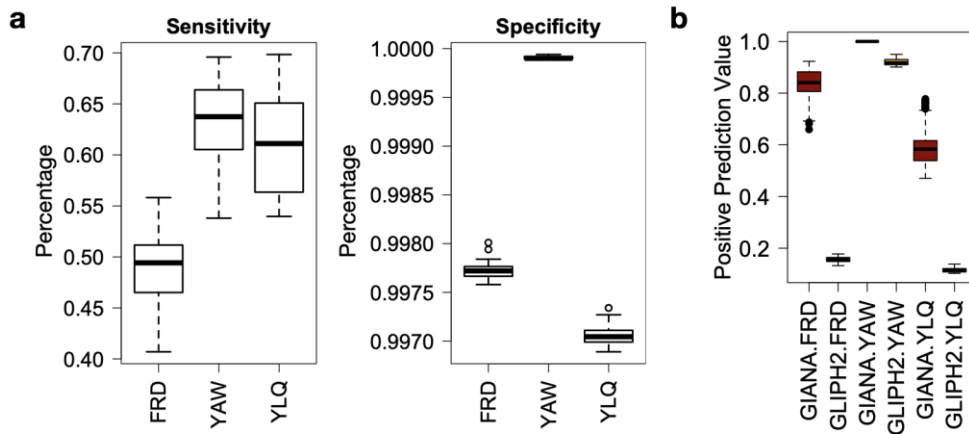

40  
 41 **Figure S6. Antigen-specific TCR prediction with GLIPH2.** a) Sensitivity and specificity estimations for  
 42 GLIPH2 using the same simulated dataset as in Figure 1e. Sensitivity and specificity were defined same way  
 43 as for GIANA. b) Positive prediction value (PPV) estimations for GLIPH2 and GIANA. PPV was defined as the  
 44 total number of correctly predicted unique TCRs divided by the total number of unique TCRs clustered with  
 45 the training data. “Unique” is necessary for this analysis because GLIPH2 may place one TCR into multiple  
 46 clusters. For each antigen, 20 times of random sampling was performed to estimate statistical uncertainty,  
 47 as shown by the boxplots.

48  
 49

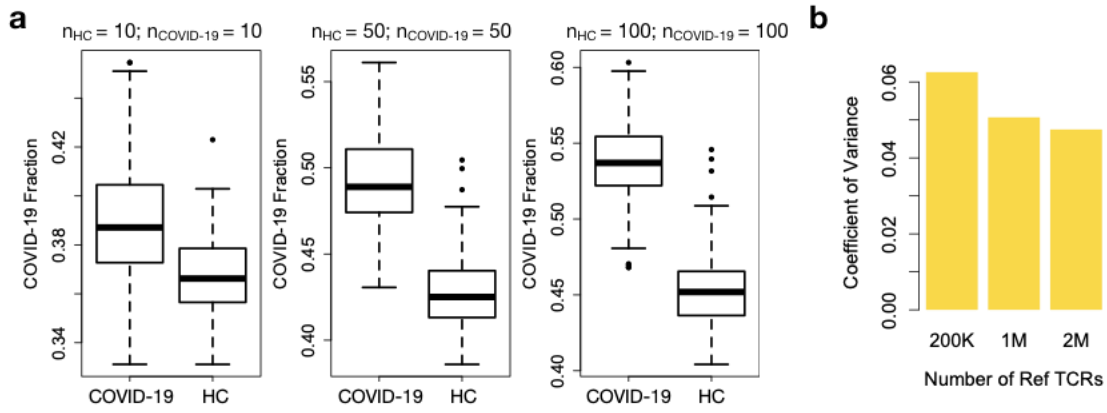

50  
51  
52  
53  
54  
55

**Figure S7. Coefficient of variance of COVID-19 fractions with different number of reference TCRs. a)** Distribution of TCR fractions co-clustered with COVID-19 reference samples under different reference data configurations. **b)** Coefficient of variance is defined as the standard deviation divided by the mean of COVID-19 fractions of the COVID-19 patients in the query samples.

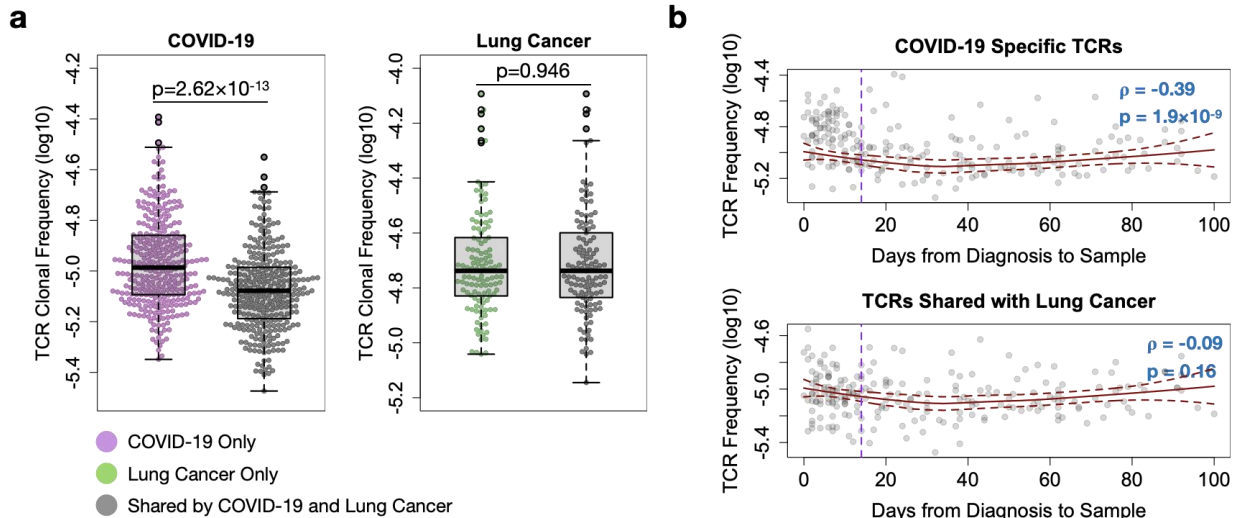

56  
57  
58  
59  
60  
61  
62  
63  
64  
65  
66

**Figure S8. COVID-19 specific TCRs are dynamically regulated during virus infection. a)** Beeswarm plot showing the distributions of TCR clonal frequencies of different categories. Left panel: TCRs specific to COVID-19 and those also shared with lung cancer patients. Right panel: TCRs specific to lung cancer (n=121) or shared with COVID-19 patients (n=311). For the shared TCRs, clonal frequencies were always chosen to match the cohort of the disease-specific TCRs. Two-sided Wilcoxon rank sum test was performed to estimate the p values. **b)** Dynamic changes of TCR clonal frequencies during the course of SARS-CoV-2 infection. Purple dashed line marks 14 days after the initial diagnosis. Spearman's correlation test was performed to evaluate the statistical significance between clonal frequency and time. Loess smooth curves with 95% confidence intervals were presented to visualize the trend of frequency changes.



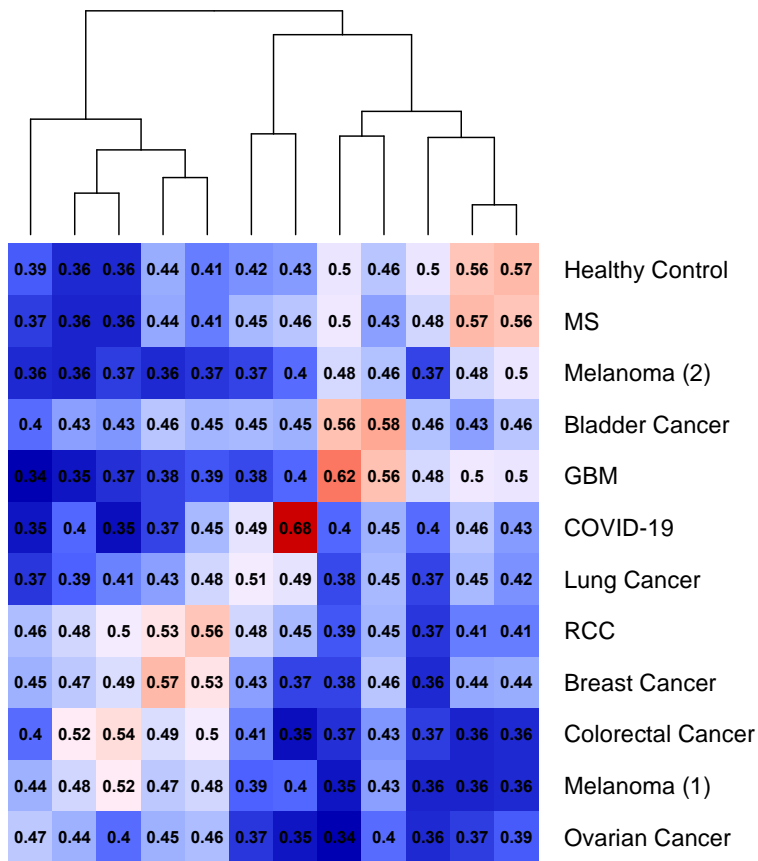

67  
68  
69  
70  
71  
72  
73  
74  
75

**Figure S9. Cross-cohort similarity of reference TCR-seq samples.** From TCR clustering data with N samples, we calculated the percentage of TCRs of each sample co-clustered with each of the other samples. We assigned the self-co-clustering percentage to be zero, to make all the vectors length N. The Spearman correlation matrix was calculated from the N-by-N co-clustering fraction matrix. The matrix is then collapsed according to the cancer types, with the mean of the top 5 highest correlations was displayed in the heatmap. Same disease correlations (diagonal values) were calculated the same way, except that self-correlations of each sample were excluded prior to the calculations.

76 **Supplementary Tables**

77

| TCR Number     |           | 10K          | 20K         | 30K         | 40K         | 50K         | 60K          | 70K          | 80K         | 90K          | 100K         |
|----------------|-----------|--------------|-------------|-------------|-------------|-------------|--------------|--------------|-------------|--------------|--------------|
| <i>GIANA</i>   | Time/s    | <b>1.5</b>   | <b>2.9</b>  | <b>4.2</b>  | <b>6.3</b>  | <b>8.4</b>  | <b>10.9</b>  | <b>13.7</b>  | <b>16.6</b> | <b>20.2</b>  | <b>23.9</b>  |
|                | Memory/MB | 87           | 109         | 120         | 137         | 142         | 149          | 161          | 175         | 182          | 194          |
| <i>GIANAsv</i> | Time/s    | <b>2.3</b>   | <b>5</b>    | <b>8.3</b>  | <b>12.2</b> | <b>17</b>   | <b>23</b>    | <b>29</b>    | <b>35.4</b> | <b>44</b>    | <b>53.3</b>  |
|                | Memory/MB | 134          | 212         | 288         | 362         | 394         | 421          | 508          | 540         | 549          | 599          |
| <i>iSMART</i>  | Time/s    | <b>16.5</b>  | <b>88.8</b> | <b>212</b>  | <b>409</b>  | <b>657</b>  | <b>984</b>   | <b>1380</b>  | <b>1833</b> | <b>2323</b>  | <b>2850</b>  |
|                | Memory/MB | 90           | 152         | 197         | 284         | 320         | 362          | 401          | 439         | 484          | 622          |
| <i>TCRdist</i> | Time/s    | <b>145.9</b> | <b>580</b>  | <b>1300</b> | <b>2330</b> | <b>3668</b> | <b>5411</b>  | <b>7371</b>  | <b>9093</b> | <b>11695</b> | <b>14338</b> |
|                | Memory/MB | 19           | 21          | 23          | 26          | 27          | 29           | 31           | 34          | 37           | 38           |
| <i>GLIPH2</i>  | Time/s    | <b>16.7</b>  | <b>34.9</b> | <b>51.9</b> | <b>75.1</b> | <b>99.6</b> | <b>127.3</b> | <b>156.7</b> | <b>183</b>  | <b>224.2</b> | <b>271.4</b> |
|                | Memory/MB | 63           | 92          | 122         | 165         | 183         | 208          | 247          | 270         | 302          | 334          |

78

79

80

81

82

**Table S1.** Comparison of computational time and memory consumption of GIANA, GIANAsv, iSMART, TCRdist and GLIPH2. System configuration: macOS Catalina v10.15.2, 3.5GHz Dual-Core Intel Core i7, 16GB 2133 MHz LPDDR3.

83

|                                                     | <b>GIANA</b> | <b>iSMART</b> | <b>TCRdist</b> | <b>GLIPH2</b> |
|-----------------------------------------------------|--------------|---------------|----------------|---------------|
| <i># Clustered TCRs</i>                             | 17,250       | 16,828        | 18,383         | 31,563        |
| <i># Clusters</i>                                   | 7,586        | 7,649         | 7,316          | 11,945        |
| <i># Pure clusters</i>                              | 7,289        | 7,387         | 7,130          | 4,333         |
| <i># Pure TCRs</i>                                  | 16,202       | 16,096        | 15,595         | 11,514        |
| <i>Specificity (Pure clusters/Clusters)</i>         | 96.1%        | 96.6%         | 97.4%          | 36.3%         |
| <i>Sensitivity (Pure TCRs/Total number of TCRs)</i> | 26.7%        | 26.5%         | 25.6%          | 19.0%         |

84

85

86

87

88

89

**Table S2.** Evaluation of pure cluster sensitivity and clustering precision for GIANA, iSMART, TCRdist and GLIPH2. A total of 61,366 TCRs with known antigen specificity were used in this analysis. After excluding singleton TCRs (only one sequence per epitope), there were 60,700 left.

90

|                                 |      | <i>Query TCR Number</i> |     |     |       |       |
|---------------------------------|------|-------------------------|-----|-----|-------|-------|
|                                 |      | 10K                     | 20K | 30K | 40K   | 50K   |
| <i>Reference<br/>TCR Number</i> | 200K | 13                      | 22  | 33  | 44    | 60    |
|                                 | 1M   | 21                      | 43  | 72  | 107   | 151   |
|                                 | 2M   | 35                      | 71  | 121 | 184   | 249   |
|                                 | 6M   | 93                      | 200 | 387 | 578   | 719   |
|                                 | 10M  | 176                     | 379 | 732 | 1,066 | 1,438 |

91

92

**Table S3:** Computational time consumption of GIANA query of TCR samples with different sizes. Time was measured in seconds.

93

94

| Disease Type          | Cohort                 | Disease                             | Sample Size | Unique Samples                                                                                                                    | Link                                                                                                                                                                        | PMID     |
|-----------------------|------------------------|-------------------------------------|-------------|-----------------------------------------------------------------------------------------------------------------------------------|-----------------------------------------------------------------------------------------------------------------------------------------------------------------------------|----------|
| Healthy Control       | Emerson et al., 2017   | Healthy Control (batch1)            | 100         | 100                                                                                                                               | <a href="https://clients.adaptivebiotech.com/pub/emerson-2017-natgen">https://clients.adaptivebiotech.com/pub/emerson-2017-natgen</a>                                       | 28369038 |
| Multiple Sclerosis    | Emerson et al., 2013   | Multiple Sclerosis                  | 50          | 25                                                                                                                                | <a href="https://clients.adaptivebiotech.com/pub/emerson-2013-jim">https://clients.adaptivebiotech.com/pub/emerson-2013-jim</a>                                             | 23428915 |
| COVID-19              | Nolan et al., 2020     | COVID-19 (Adaptive, ISB)            | 311         | 311                                                                                                                               | <a href="https://clients.adaptivebiotech.com/pub/covid-2020">https://clients.adaptivebiotech.com/pub/covid-2020</a>                                                         | 32793896 |
| Cancer                | Snyder et al., 2017    | Bladder Cancer                      | 117         | 30                                                                                                                                | <a href="https://clients.adaptivebiotech.com/pub/snyder-2017-plosmedicine">https://clients.adaptivebiotech.com/pub/snyder-2017-plosmedicine</a>                             | 28552987 |
|                       | Mansfield et al., 2018 | Lung Cancer and Brain Metastasis    | 40          | 20                                                                                                                                | <a href="https://clients.adaptivebiotech.com/pub/mansfield-2018-scientificreports">https://clients.adaptivebiotech.com/pub/mansfield-2018-scientificreports</a>             | 29391594 |
|                       | Sims et al., 2016      | Glioma                              | 32          | 15                                                                                                                                | <a href="https://www.ncbi.nlm.nih.gov/geo/query/acc.cgi?acc=GSE79338">https://www.ncbi.nlm.nih.gov/geo/query/acc.cgi?acc=GSE79338</a>                                       | 27261081 |
|                       | Page et al., 2019      | Breast Cancer                       | 63          | 16                                                                                                                                | <a href="https://clients.adaptivebiotech.com/pub/page-2019-ccr">https://clients.adaptivebiotech.com/pub/page-2019-ccr</a>                                                   | 31831558 |
|                       | Reuben et al., 2019    | Lung Cancer                         | 121         | 121                                                                                                                               | <a href="https://clients.adaptivebiotech.com/pub/reuben-2019-natcomms">https://clients.adaptivebiotech.com/pub/reuben-2019-natcomms</a>                                     | 32001676 |
|                       | Emerson et al., 2013   | Ovarian Cancer                      | 96          | 5                                                                                                                                 | <a href="https://clients.adaptivebiotech.com/pub/emerson-2013-ipathol">https://clients.adaptivebiotech.com/pub/emerson-2013-ipathol</a>                                     | 24027095 |
|                       | Stromnes et al., 2017  | Pancreatic Cancer                   | 16          | 16                                                                                                                                | <a href="https://clients.adaptivebiotech.com/pub/stromnes-2017-cancerimmunologyresearch">https://clients.adaptivebiotech.com/pub/stromnes-2017-cancerimmunologyresearch</a> | 29066497 |
|                       | Tumeh et al., 2014     | Melanoma                            | 34          | 23                                                                                                                                | <a href="https://clients.adaptivebiotech.com/pub/tumeh-2014-nature">https://clients.adaptivebiotech.com/pub/tumeh-2014-nature</a>                                           | 25428505 |
|                       | Le et al., 2017        | Colorectal Cancer                   | 35          | 3                                                                                                                                 | <a href="https://clients.adaptivebiotech.com/pub/diaz-2017-science">https://clients.adaptivebiotech.com/pub/diaz-2017-science</a>                                           | 28596308 |
|                       | Duhen et al., 2018     | Head and Neck, Ovarian and Melanoma | 33          | 8                                                                                                                                 | <a href="https://clients.adaptivebiotech.com/pub/duhen-2018-natcomms">https://clients.adaptivebiotech.com/pub/duhen-2018-natcomms</a>                                       | 30006565 |
|                       | Chow et al., 2020      | Renal Cell Carcinoma                | 53          | 26                                                                                                                                | <a href="https://clients.adaptivebiotech.com/pub/chow-2020-pnas">https://clients.adaptivebiotech.com/pub/chow-2020-pnas</a>                                                 | 32900949 |
| Riaz et al., 2017     | Melanoma               | 58                                  | 29          | <a href="https://github.com/riazn/bms038_analysis">https://github.com/riazn/bms038_analysis</a>                                   | 29033130                                                                                                                                                                    |          |
| Sherwood et al., 2013 | Colorectal Cancer      | 14                                  | 14          | <a href="https://clients.adaptivebiotech.com/pub/sherwood-2013-cji">https://clients.adaptivebiotech.com/pub/sherwood-2013-cji</a> | 23771160                                                                                                                                                                    |          |

96

97

98

99

100

101

102

103

104

105

106

107

**Table S4.** TCR-seq sample cohorts used as the reference data. For some cohorts, not all the available samples were used when creating the reference data. For each sample, we selected the top 10,000 most abundant TCRs, and if the data contained fewer than 10,000 sequences, all were used. Unique samples indicated the number of independent patients involved in the study. Sample size recorded the number of total TCR-seq samples in that cohort that were used in the reference. Emerson 2017 cohort contained 666 healthy donors in batch 1, from which we randomly selected 100 samples. The COVID-19 cohort contained over 1,400 patients, assembled from multiple international COVID-19 studies. We selected two cohorts collected by Adaptive Biotechnology (Adaptive, n=154) and Institute for System Biology (ISB, n=157) respectively. GIANA took 19.5 hours to cluster the reference data on a high performance computing cluster with 8 CPUs and 128G memory.

| Disease Type              | Cohort                | Disease                              | Sample Size | Unique Samples | Link                                                                                                                                                              | PMID     |
|---------------------------|-----------------------|--------------------------------------|-------------|----------------|-------------------------------------------------------------------------------------------------------------------------------------------------------------------|----------|
| <i>Healthy Control</i>    | Emerson et al., 2017  | Healthy Control (batch2)             | 120         | 120            | <a href="https://clients.adaptivebiotech.com/pub/emerson-2017-natgen">https://clients.adaptivebiotech.com/pub/emerson-2017-natgen</a>                             | 28369038 |
|                           | DeWitt et al., 2018   | Active Tuberculosis                  | 33          | 33             | <a href="https://clients.adaptivebiotech.com/pub/seshadri-2018-journalofimmunology">https://clients.adaptivebiotech.com/pub/seshadri-2018-journalofimmunology</a> | 29914888 |
| <i>Multiple Sclerosis</i> | Bertoli et al., 2019  | Multiple Sclerosis                   | 12          | 6              | <a href="https://clients.adaptivebiotech.com/pub/bertoli-2019-sr">https://clients.adaptivebiotech.com/pub/bertoli-2019-sr</a>                                     | 31719595 |
| <i>COVID-19</i>           | Nolan et al., 2020    | COVID-19 (HUniv120)                  | 193         | 193            | <a href="https://clients.adaptivebiotech.com/pub/covid-2020">https://clients.adaptivebiotech.com/pub/covid-2020</a>                                               | 32793896 |
| <i>Cancer</i>             | Beshnova et al., 2020 | Ovarian, Pancreatic and Renal Cancer | 25          | 25             | <a href="https://zenodo.org/record/3894880#.YHsVai2ZN3k">https://zenodo.org/record/3894880#.YHsVai2ZN3k</a>                                                       | 32817363 |
|                           | Robert et al., 2014   | Melanoma                             | 21          | 21             | <a href="https://clients.adaptivebiotech.com/pub/robert-2014-CCR">https://clients.adaptivebiotech.com/pub/robert-2014-CCR</a>                                     | 24583799 |
|                           | Beausang et al., 2017 | Breast Cancer                        | 16          | 16             | <a href="https://clients.adaptivebiotech.com/pub/beausang-2017-pnas">https://clients.adaptivebiotech.com/pub/beausang-2017-pnas</a>                               | 29138313 |

109

110

111

112

113

114

115

**Table S5.** TCR-seq sample cohorts used as the query data. All 120 of the second batch of healthy donors from the Emerson 2017 study were used as control. To avoid overlap with the reference, for the COVID-19 patients, we used the Hospital Universitario 12 de Octubre (HUniv120, n=193) cohort from the Nolan 2020 study. The patients in this cohort were collected from Madrid, Spain. It took GIANA 20.5 hours to finish the query of all 420 samples on a MacBook Pro with 3.5GHz Dual-Core Intel Core i7 processor, and 16GB 2133 MHz LPDDR3 memory.
